# Supplementary material
Source: MDPI journal article supplement (https://www.mdpi.com/2072-4292/9/5/485)
Supplement: s1 [file s1]

1 *Supplementary material to:*

2 **Evaluation of the Plant Phenology Index (PPI), NDVI and EVI for start-of-season trend**  
 3 **analysis of the Northern Hemisphere boreal zone**

4 **Paulina Karkauskaite <sup>1</sup>, Torbern Tagesson <sup>2</sup> and Rasmus Fensholt <sup>2,\*</sup>**

5 **Table S1.** Descriptive statistics from the evaluation of vegetation index based start of season (SOS) against gross primary production (GPP) estimates of SOS for the different  
 6 land cover classes.

| Land cover classes (LCC)         | GPP       |     |     | PPI       |     |     | EVI       |     |     | NDVI      |     |     |
|----------------------------------|-----------|-----|-----|-----------|-----|-----|-----------|-----|-----|-----------|-----|-----|
|                                  | Mean±S.D. | Max | Min |
| Average all LCC (81)             | 128±21    | 181 | 78  | 126±18    | 162 | 88  | 116±25    | 171 | 29  | 99±21     | 145 | 37  |
| Evergreen Needleleaf forest (49) | 121±16    | 165 | 78  | 119±17    | 154 | 88  | 119±24    | 171 | 58  | 101±21    | 136 | 37  |
| Deciduous Needleleaf forest (3)  | 135±9     | 141 | 125 | 133±7     | 138 | 125 | 105±8     | 113 | 97  | 98±9      | 107 | 90  |
| Mixed forest (12)                | 129±15    | 149 | 96  | 132±7     | 144 | 124 | 131±8     | 153 | 122 | 87±18     | 113 | 54  |
| Open shrublands (15)             | 144±26    | 181 | 86  | 142±14    | 162 | 116 | 95±25     | 130 | 29  | 96±18     | 130 | 72  |
| Wetlands (2)                     | 167±4     | 170 | 164 | 136±6     | 141 | 132 | 135±6     | 139 | 130 | 141±5     | 145 | 138 |

7

8

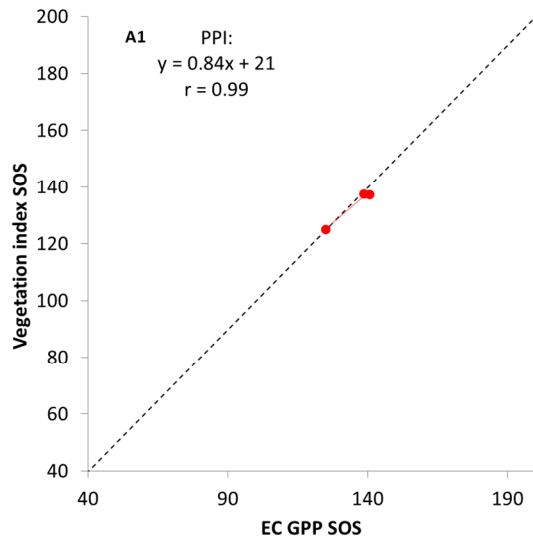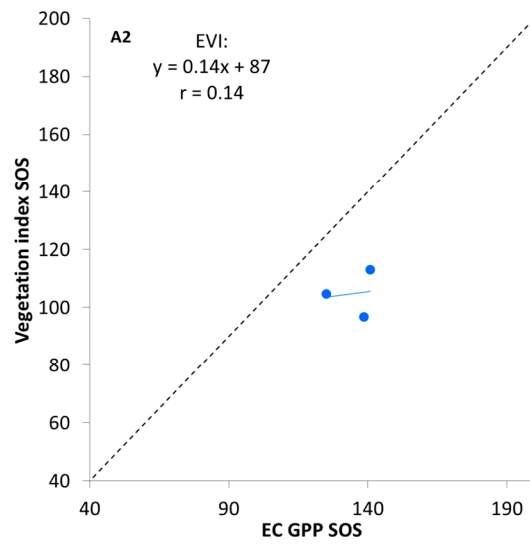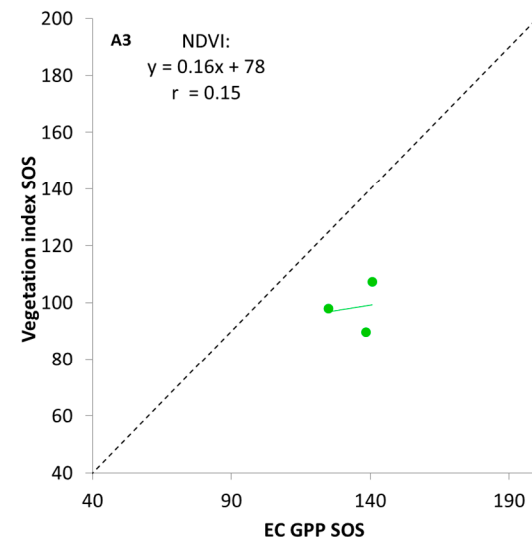

9

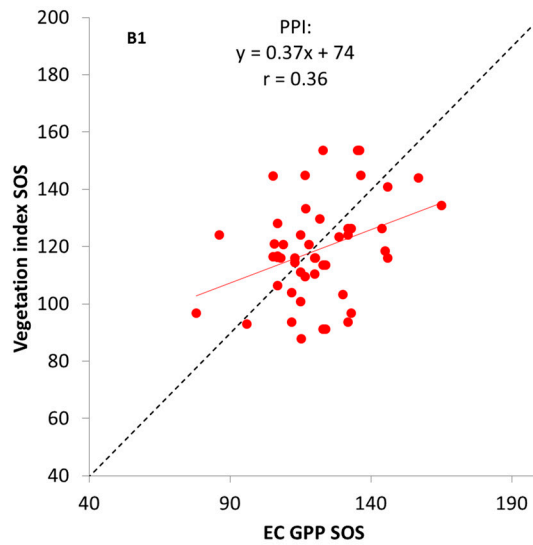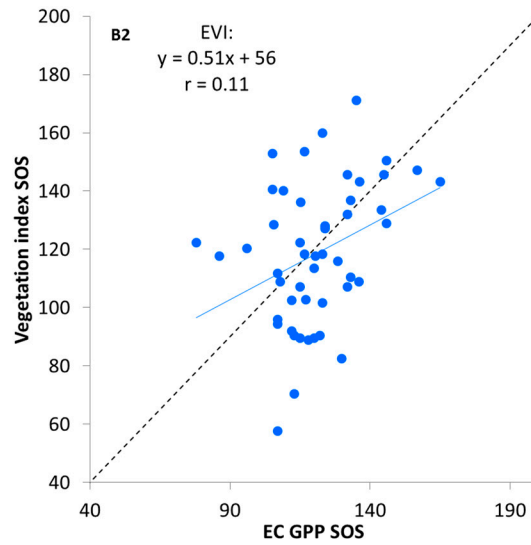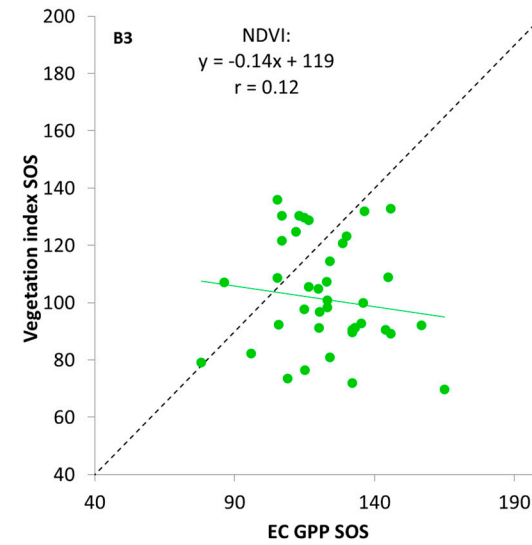

10  
11

12

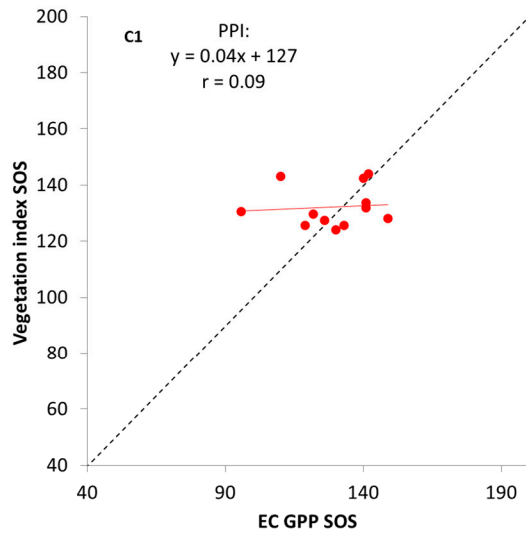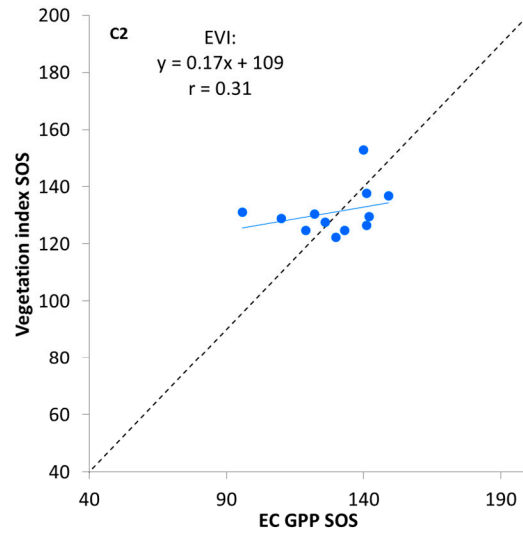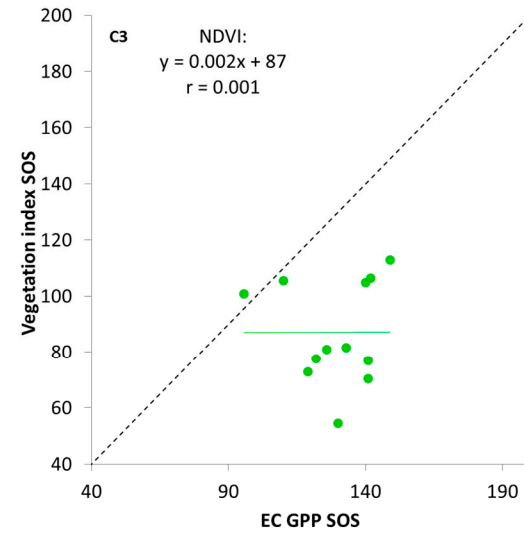

13

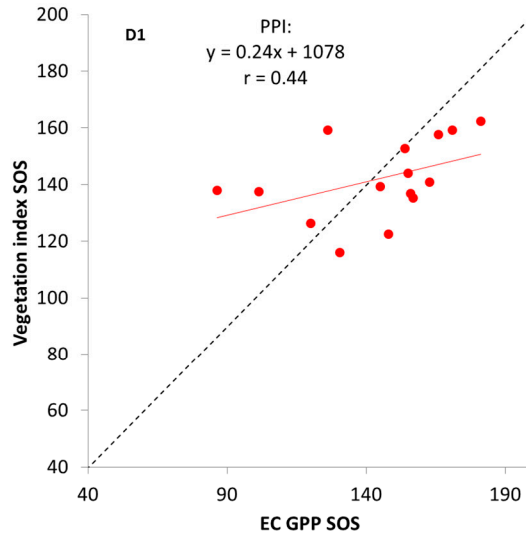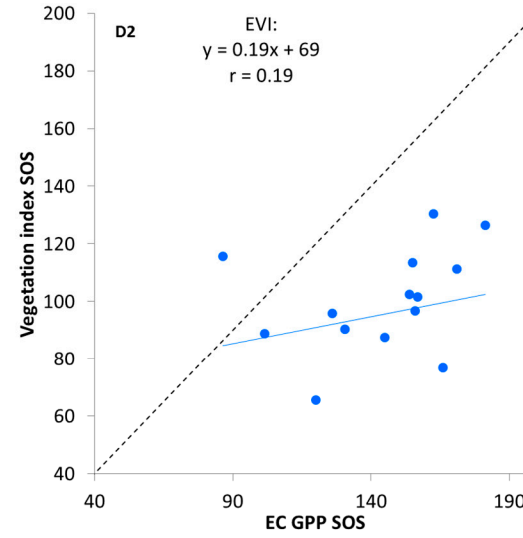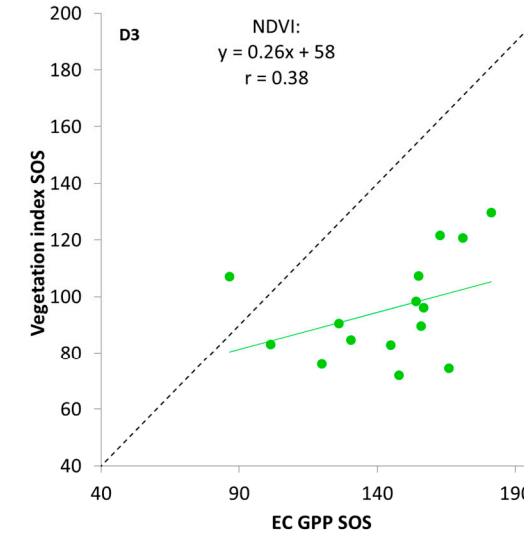

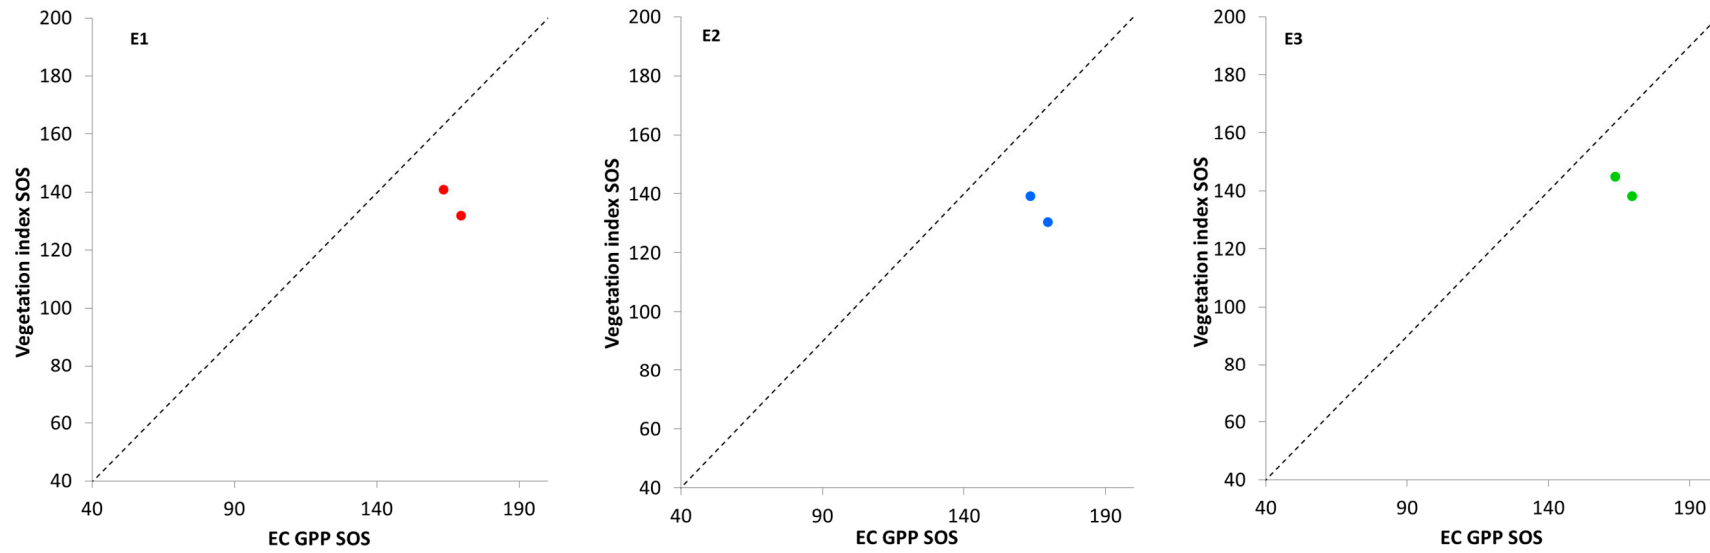

14  
15  
16  
17

**Figure S1.** Vegetation index start of season (SOS) evaluation against GPP SOS derived from flux tower data separated into its different land cover classes for (1) PPI; (2) EVI; and (3) NDVI. The different land cover classes are: (A) Deciduous needle leaf forest; (B) Evergreen needle leaf forest (ENF); (C) mixed forest (MF); (D) open shrubland (OSH); and (E) wetland (WET). Which exact sites and years that are included in the different subplots can be seen in Table A1.
